# Supplementary material for: SGK1 Inhibits Autophagy in Murine Muscle Tissue
Source: Oxid Med Cell Longev. 2018 Apr 22;2018:4043726. doi: 10.1155/2018/4043726 (PMC5937381; doi:10.1155/2018/4043726)
Supplement: Supplementary Materials — Supporting data is provided in the Supplementary Data Set (Suppl. Data Set). As indicated in each figure legend, the Suppl. Data Set (excel file) includes statistical analyses with p values for the following main figures: Figures 1(a), 1(b), 2(a), 2(b), 3(a), 3(b), 4(a), 4(b), 5(b), 6(b), and 7(b). Individual excel sheet labels correspond to the main figure labels. [file 4043726.f1.xlsx]

## Sheet: Figure 1A
				Intensity [a.u.]		Normalized over Tubulin				ttest: LC3-II/Tubulin	p-value		ttest: LC3-II/Tubulin	p-value
Nutrition	Sample	Sample ID	Genotype	LC3-II	Tubulin	LC3-II	Mean	STDV		SGK1+/+ : Fed vs. Starved	0.0136581		SGK1+/+ vs. SGK1-/-	0.0056515
Fed*	red muscle 2	F2	SGK1+/+	51554746	38178351	1.35037	1.79971	0.726777		SGK1-/- : Fed vs. Starved	0.877663
Fed*	red muscle 3	F3	SGK1+/+	49984936	40842919	1.22383				Fed: SGK1+/+ vs. SGK1-/-	0.00299222
Fed*	red muscle 7	F7	SGK1+/+	113655142	40232933	2.82493				Starved: SGK1+/+ vs. SGK1-/-	0.624291
Starved**	red muscle 5	S5	SGK1+/+	83704986	17907337	4.67434	5.85678	1.03828
Starved**	red muscle 6	S6	SGK1+/+	153365988	21295118	7.20193
Starved**	red muscle 12	S12	SGK1+/+	230563954	40492028	5.69406
Fed*	red muscle 1	F1	SGK1-/-	287016923	52542516	5.46257	6.23446	0.570964
Fed*	red muscle 8	F8	SGK1-/-	295814813	46112087	6.41513
Fed*	red muscle 9	F9	SGK1-/-	324960857	47608585	6.82568
Starved**	red muscle 4	S4	SGK1-/-	212104811	29937918	7.08482	6.34813	0.789172
Starved**	red muscle 10	S10	SGK1-/-	271457996	40480915	6.70583
Starved**	red muscle 11	S11	SGK1-/-	134886231	25674384	5.25373
* 24 h food and water ad libitum prior to sacrifice
** 24 h no food, water ad libitum prior to sacrifice
				LC3-II/Tubulin	LC3-II/Tubulin
		Nutrition	Genotype	Mean	STDV
		Fed*	SGK1+/+	1.79971	0.726777
		Fed*	SGK1-/-	6.23446	0.570964
		Starved**	SGK1+/+	5.85678	1.03828
		Starved**	SGK1-/-	6.34813	0.789172

## Sheet: Figure 1B
				Intensity [a.u.]		Normalized over Tubulin				ttest: Atg12-5/Tubulin	p-value		ttest: Atg12-5/Tubulin	p-value
Nutrition	Sample	Sample ID	Genotype	Atg12-5	Tubulin	Atg12-5	Mean	STDV		SGK1+/+ : Fed vs. Starved	0.28252		SGK1+/+ vs. SGK1-/-	0.0296661
Fed*	Red muscle 2	F2	SGK1+/+	93997057	51932007	1.81	1.48266	0.242705		SGK1-/- : Fed vs. Starved	0.333105
Fed*	Red muscle 3	F3	SGK1+/+	65039085	46179588	1.40839				Fed: SGK1+/+ vs. SGK1-/-	0.0553331
Fed*	Red muscle 7	F7	SGK1+/+	91591695	74490201	1.22958				Starved: SGK1+/+ vs. SGK1-/-	0.16944
Starved**	Red muscle 5	S5	SGK1+/+	63547864	27843463	2.28233	2.30695	0.806094
Starved**	Red muscle 6	S6	SGK1+/+	90767412	27452910	3.30629
Starved**	Red muscle 12	S12	SGK1+/+	104506511	78444462	1.33224
Fed*	Red muscle 1	F1	SGK1-/-	167519570	61747516	2.71298	3.7246	0.848334
Fed*	Red muscle 8	F8	SGK1-/-	185226928	50444855	3.67187
Fed*	Red muscle 9	F9	SGK1-/-	195037561	40726541	4.78895
Starved**	Red muscle 4	S4	SGK1-/-	189129492	48925333	3.86568	6.03655	2.58182
Starved**	Red muscle 10	S10	SGK1-/-	177282796	38712168	4.57951
Starved**	Red muscle 11	S11	SGK1-/-	133274702	13790180	9.66446
* 24 h food and water ad libitum prior to sacrifice
** 24 h no food, water ad libitum prior to sacrifice
				Atg12-5/Tubulin
		Nutrition	Genotype	Mean	STDV
		Fed*	SGK1+/+	1.48266	0.242705
		Fed*	SGK1-/-	3.7246	0.848334
		Starved**	SGK1+/+	2.30695	0.806094
		Starved**	SGK1-/-	6.03655	2.58182

## Sheet: Figure 2A
				Intensity [a.u.]			Normalized over Tubulin		Ratio	LC3-II/Tubulin	LC3-II/Tubulin		ttest: LC3-II/Tubulin	p-value		ttest: LC3-II/Tubulin	p-value
Nutrition	Sample	Sample ID	Genotype	LC3-I	LC3-II	Tubulin	LC3-II	Total LC3	LC3-II/LC3-I	Mean	STDV		SGK1+/+ : Fed vs. Starved	0.162682		SGK1+/+ vs. SGK1-/-	0.112021
Fed*	White muscle 2	F2	SGK1+/+	10595660	10005700	225280566	0.0444144	0.0914476	0.944321	0.0732456	0.0396381		SGK1-/- : Fed vs. Starved	0.94218
Fed*	White muscle 3	F3	SGK1+/+	20300851	10928054	237423078	0.0460278	0.131533	0.538305				Fed: SGK1+/+ vs. SGK1-/-	0.765714
Fed*	White muscle 7	F7	SGK1+/+	45021494	20460341	158245818	0.129295	0.413798	0.454457				Starved: SGK1+/+ vs. SGK1-/-	0.0467457
Starved**	White muscle 5	S5	SGK1+/+	17075059	17810883	160778960	0.110779	0.216981	1.04309	0.132627	0.0261313
Starved**	White muscle 6	S6	SGK1+/+	41405117	22769275	193388677	0.117738	0.331842	0.549915
Starved**	White muscle 12	S12	SGK1+/+	67055518	36258978	214090549	0.169363	0.482574	0.540731				ttest: LC3-II/LC3-I	p-value		ttest: LC3-II/LC3-I	p-value
Fed*	White muscle 1	F1	SGK1-/-	47672020	18368890	246824311	0.0744209	0.267562	0.385318	0.0635209	0.0104828		SGK1+/+ : Fed vs. Starved	0.784966		SGK1+/+ vs. SGK1-/-	0.0430755
Fed*	White muscle 8	F8	SGK1-/-	13177648	15221891	308330232	0.0493688	0.0921075	1.15513				SGK1-/- : Fed vs. Starved	0.546935
Fed*	White muscle 9	F9	SGK1-/-	10245652	15107610	226253535	0.0667729	0.112057	1.47454				Fed: SGK1+/+ vs. SGK1-/-	0.392099
Starved**	White muscle 4	S4	SGK1-/-	10024029	11798588	218395609	0.0540239	0.0999224	1.17703	0.06445	0.0133389		Starved: SGK1+/+ vs. SGK1-/-	0.0694392
Starved**	White muscle 10	S10	SGK1-/-	10675269	12381716	220911728	0.0560483	0.104372	1.15985
Starved**	White muscle 11	S11	SGK1-/-	13357129	18439914	221426410	0.0832778	0.143601	1.38053
* 24 h food and water ad libitum prior to sacrifice													ttest: total LC3/Tubulin	p-value		ttest: total LC3/Tubulin	p-value
** 24 h no food, water ad libitum prior to sacrifice													SGK1+/+ : Fed vs. Starved	0.363734		SGK1+/+ vs. SGK1-/-	0.0832236
													SGK1-/- : Fed vs. Starved	0.537944
				LC3-II/Tubulin	LC3-II/Tubulin								Fed: SGK1+/+ vs. SGK1-/-	0.665694
		Nutrition	Genotype	Mean	STDV								Starved: SGK1+/+ vs. SGK1-/-	0.0931319
		Fed*	SGK1+/+	0.0732456	0.0396381
		Fed*	SGK1-/-	0.0635209	0.0104828
		Starved**	SGK1+/+	0.132627	0.0261313
		Starved**	SGK1-/-	0.06445	0.0133389

## Sheet: Figure 2B
				Intensity [a.u.]			Normalized over Tubulin		Ratio				ttest: LC3-II/Tubulin	p-value		ttest: LC3-II/Tubulin	p-value
Nutrition	Sample	Sample ID	Genotype	LC3-I	LC3-II	Tubulin	LC3-II	Total LC3	LC3-II/LC3-I	Mean	STDV		SGK1+/+ : Fed vs. Starved	0.258172		SGK1+/+ vs. SGK1-/-	0.0787588
Fed*	Liver 2	F2	SGK1+/+	688974	623735	1083628	0.575599	1.2114	0.90531	0.516571	0.0605298		SGK1-/- : Fed vs. Starved	0.375021
Fed*	Liver 3	F3	SGK1+/+	609219	683829	1577943	0.433367	0.819452	1.12247				Fed: SGK1+/+ vs. SGK1-/-	0.00276058
Fed*	Liver 7	F7	SGK1+/+	654884	676355	1250780	0.540747	1.06433	1.03279				Starved: SGK1+/+ vs. SGK1-/-	0.519955
Starved**	Liver 5	S5	SGK1+/+	772489	667847	752422	0.887596	1.91427	0.864539	0.868999	0.320641
Starved**	Liver 6	S6	SGK1+/+	929742	806010	643740	1.25207	2.69636	0.866918
Starved**	Liver 12	S12	SGK1+/+	462491	502885	1076088	0.467327	0.897116	1.08734				ttest: LC3-II/LC3-I	p-value		ttest: LC3-II/LC3-I	p-value
Fed*	Liver 1	F1	SGK1-/-	323339	441568	523299	0.843816	1.4617	1.36565	0.921666	0.0624574		SGK1+/+ : Fed vs. Starved	0.454274		SGK1+/+ vs. SGK1-/-	0.440152
Fed*	Liver 8	F8	SGK1-/-	991435	877700	880581	0.996728	2.12262	0.885282				SGK1-/- : Fed vs. Starved	0.514775
Fed*	Liver 9	F9	SGK1-/-	694227	793996	858880	0.924455	1.73275	1.14371				Fed: SGK1+/+ vs. SGK1-/-	0.521547
Starved**	Liver 4	S4	SGK1-/-	852529	883265	1030397	0.857208	1.68459	1.03605	1.0542	0.163807		Starved: SGK1+/+ vs. SGK1-/-	0.737043
Starved**	Liver 10	S10	SGK1-/-	1298459	972856	929060	1.04714	2.44475	0.749239
Starved**	Liver 11	S11	SGK1-/-	750424	900214	715440	1.25827	2.30716	1.19961
* 24 h food and water ad libitum prior to sacrifice													ttest: total LC3/Tubulin	p-value		ttest: total LC3/Tubulin	p-value
** 24 h no food, water ad libitum prior to sacrifice													SGK1+/+ : Fed vs. Starved	0.259968		SGK1+/+ vs. SGK1-/-	0.161115
													SGK1-/- : Fed vs. Starved	0.287232
				LC3-II/Tubulin	LC3-II/Tubulin								Fed: SGK1+/+ vs. SGK1-/-	0.0399368
		Nutrition	Genotype	Mean	STDV								Starved: SGK1+/+ vs. SGK1-/-	0.628155
		Fed*	SGK1+/+	0.516571	0.0605298
		Fed*	SGK1-/-	0.921666	0.0624574
		Starved**	SGK1+/+	0.868999	0.320641
		Starved**	SGK1-/-	1.0542	0.163807

## Sheet: Figure 3A
				Intensity [a.u.]			Normalized over Tubulin		Ratio				ttest: LC3-II/Tubulin	p-value		ttest: LC3-II/Tubulin	p-value
Nutrition	Sample	Sample ID	Genotype	LC3-I	LC3-II	Tubulin	LC3-II	Total LC3	LC3-II/LC3-I	Mean	STDV		SGK1+/+ : Fed vs. Starved	0.131767		SGK1+/+ vs. SGK1-/-	0.0676938
Fed*	Heart 2	F2	SGK1+/+	78372748	153141261	127648272	1.19971	1.81369	1.95401	1.06224	0.165937		SGK1-/- : Fed vs. Starved	0.591841
Fed*	Heart 3	F3	SGK1+/+	81470322	133914389	115622139	1.15821	1.86283	1.64372				Fed: SGK1+/+ vs. SGK1-/-	0.287878
Fed*	Heart 7	F7	SGK1+/+	21333334	113018589	136365207	0.828793	0.985236	5.29775				Starved: SGK1+/+ vs. SGK1-/-	0.222943
Starved**	Heart 5	S5	SGK1+/+	45822696	90824421	92523417	0.981637	1.47689	1.98208	0.605686	0.277025
Starved**	Heart 6	S6	SGK1+/+	17221264	49096258	95674915	0.513157	0.693155	2.85091
Starved**	Heart 12	S12	SGK1+/+	30220127	63871300	198195430	0.322264	0.474741	2.11354				ttest: LC3-II/LC3-I	p-value		ttest: LC3-II/LC3-I	p-value
Fed*	Heart 1	F1	SGK1-/-	44449691	97079099	138628166	0.700284	1.02092	2.18402	2.0244	0.952284		SGK1+/+ : Fed vs. Starved	0.637992		SGK1+/+ vs. SGK1-/-	0.314792
Fed*	Heart 8	F8	SGK1-/-	44856249	226819959	78232226	2.89932	3.47269	5.0566				SGK1-/- : Fed vs. Starved	0.728575
Fed*	Heart 9	F9	SGK1-/-	80699482	215204453	87000832	2.47359	3.40116	2.66674				Fed: SGK1+/+ vs. SGK1-/-	0.830391
Starved**	Heart 4	S4	SGK1-/-	35237580	73236677	156442081	0.468139	0.693383	2.07837	1.52174	0.75691		Starved: SGK1+/+ vs. SGK1-/-	0.341275
Starved**	Heart 10	S10	SGK1-/-	52336575	169730625	76721372	2.2123	2.89446	3.24306
Starved**	Heart 11	S11	SGK1-/-	34310316	217156490	115216421	1.88477	2.18256	6.32919
* 24 h food and water ad libitum prior to sacrifice													ttest: total LC3/Tubulin	p-value		ttest: total LC3/Tubulin	p-value
** 24 h no food, water ad libitum prior to sacrifice													SGK1+/+ : Fed vs. Starved	0.18224		SGK1+/+ vs. SGK1-/-	0.0910568
													SGK1-/- : Fed vs. Starved	0.532742
				LC3-II/Tubulin	LC3-II/Tubulin								Fed: SGK1+/+ vs. SGK1-/-	0.312376
		Nutrition	Genotype	Mean	STDV								Starved: SGK1+/+ vs. SGK1-/-	0.246661
		Fed*	SGK1+/+	1.06224	0.165937
		Fed*	SGK1-/-	2.0244	0.952284
		Starved**	SGK1+/+	0.605686	0.277025
		Starved**	SGK1-/-	1.52174	0.75691

## Sheet: Figue 3B
				Intensity [a.u.]			Normalized over Tubulin		Ratio				ttest: LC3-II/Tubulin	p-value		ttest: LC3-II/Tubulin	p-value
Nutrition	Sample	Sample ID	Genotype	LC3-I	LC3-II	Tubulin	LC3-II	Total LC3	LC3-II/LC3-I	Mean	STDV		SGK1+/+ : Fed vs. Starved	0.424316		SGK1+/+ vs. SGK1-/-	0.555161
Fed*	Aorta 2	F2	SGK1+/+	316104	1454900	681695	2.13424	2.59794	4.6026	3.59911	1.3041		SGK1-/- : Fed vs. Starved	0.990274
Fed*	Aorta 3	F3	SGK1+/+	193684	1648696	490515	3.36115	3.75601	8.5123				Fed: SGK1+/+ vs. SGK1-/-	0.530189
Fed*	Aorta 7	F7	SGK1+/+	447624	1197234	225811	5.30193	7.28422	2.67464				Starved: SGK1+/+ vs. SGK1-/-	0.882876
Starved**	Aorta 5	S5	SGK1+/+	193956	1384812	225746	6.13438	6.99356	7.13983	4.72842	1.23526
Starved**	Aorta 6	S6	SGK1+/+	336412	1442703	293033	4.92335	6.07138	4.2885
Starved**	Aorta 12	S12	SGK1+/+	216783	1079601	345193	3.12753	3.75553	4.9801				ttest: LC3-II/LC3-I	p-value		ttest: LC3-II/LC3-I	p-value
Fed*	Aorta 1	F1	SGK1-/-	590435	1083674	306254	3.53848	5.46641	1.83538	5.15081	2.78914		SGK1+/+ : Fed vs. Starved	0.921343		SGK1+/+ vs. SGK1-/-	0.0500675
Fed*	Aorta 8	F8	SGK1-/-	415826	1585043	174669	9.07455	11.4552	3.81179				SGK1-/- : Fed vs. Starved	0.706155
Fed*	Aorta 9	F9	SGK1-/-	258395	615638	216819	2.83941	4.03116	2.38255				Fed: SGK1+/+ vs. SGK1-/-	0.267735
Starved**	Aorta 4	S4	SGK1-/-	530490	1442057	142027	10.1534	13.8885	2.71835	5.19459	3.83965		Starved: SGK1+/+ vs. SGK1-/-	0.224717
Starved**	Aorta 10	S10	SGK1-/-	295153	1659421	358296	4.63142	5.45519	5.62224
Starved**	Aorta 11	S11	SGK1-/-	231652	326850	409105	0.798939	1.36518	1.41095
* 24 h food and water ad libitum prior to sacrifice													ttest: total LC3/Tubulin	p-value		ttest: total LC3/Tubulin	p-value
** 24 h no food, water ad libitum prior to sacrifice													SGK1+/+ : Fed vs. Starved	0.572139		SGK1+/+ vs. SGK1-/-	0.404009
													SGK1-/- : Fed vs. Starved	0.986097
				LC3-II/Tubulin	LC3-II/Tubulin								Fed: SGK1+/+ vs. SGK1-/-	0.422972
		Nutrition	Genotype	Mean	STDV								Starved: SGK1+/+ vs. SGK1-/-	0.762675
		Fed*	SGK1+/+	3.59911	1.3041
		Fed*	SGK1-/-	5.15081	2.78914
		Starved**	SGK1+/+	4.72842	1.23526
		Starved**	SGK1-/-	5.19459	3.83965

## Sheet: Figure 4A
				Intensity [a.u.]			Normalized over Tubulin		Ratio				ttest: LC3-II/Tubulin	p-value		ttest: LC3-II/Tubulin	p-value
Nutrition	Sample	Sample ID	Genotype	LC3-I	LC3-II	Tubulin	LC3-II	Total LC3	LC3-II/LC3-I	Mean	STDV		SGK1+/+ : Fed vs. Starved	0.863549		SGK1+/+ vs. SGK1-/-	0.288727
Fed*	Kidney 2	F2	SGK1+/+	294353695	28826282	84742107	0.340165	3.81369	0.0979308	0.213688	0.0909872		SGK1-/- : Fed vs. Starved	0.0959523
Fed*	Kidney 3	F3	SGK1+/+	210679559	35296148	206454709	0.170963	1.19143	0.167535				Fed: SGK1+/+ vs. SGK1-/-	0.120322
Fed*	Kidney 7	F7	SGK1+/+	171562197	21750895	167395466	0.129937	1.15483	0.126781				Starved: SGK1+/+ vs. SGK1-/-	0.620091
Starved**	Kidney 5	S5	SGK1+/+	256217939	42944819	100025441	0.429339	2.99087	0.167611	0.235226	0.137259
Starved**	Kidney 6	S6	SGK1+/+	215602080	23724482	171257069	0.138531	1.39747	0.110038
Starved**	Kidney 12	S12	SGK1+/+	193561398	29163565	211626527	0.137807	1.05244	0.150668				ttest: LC3-II/LC3-I	p-value		ttest: LC3-II/LC3-I	p-value
Fed*	Kidney 1	F1	SGK1-/-	229184639	49064176	174969739	0.280415	1.59027	0.214081	0.554251	0.198143		SGK1+/+ : Fed vs. Starved	0.673576		SGK1+/+ vs. SGK1-/-	0.0164144
Fed*	Kidney 8	F8	SGK1-/-	259037786	67687972	105815699	0.639678	3.08769	0.261305				SGK1-/- : Fed vs. Starved	0.0469433
Fed*	Kidney 9	F9	SGK1-/-	218191864	46737592	62932645	0.742661	4.20973	0.214204				Fed: SGK1+/+ vs. SGK1-/-	0.0200189
Starved**	Kidney 4	S4	SGK1-/-	208421431	34880786	122159307	0.285535	1.99168	0.167357	0.172583	0.0875881		Starved: SGK1+/+ vs. SGK1-/-	0.347934
Starved**	Kidney 10	S10	SGK1-/-	199351139	31340511	195706284	0.160141	1.17876	0.157213
Starved**	Kidney 11	S11	SGK1-/-	57190244	9494263	131728887	0.0720743	0.506225	0.166012
* 24 h food and water ad libitum prior to sacrifice													ttest: total LC3/Tubulin	p-value		ttest: total LC3/Tubulin	p-value
** 24 h no food, water ad libitum prior to sacrifice													SGK1+/+ : Fed vs. Starved	0.834152		SGK1+/+ vs. SGK1-/-	0.830236
													SGK1-/- : Fed vs. Starved	0.13566
				LC3-II/Tubulin	LC3-II/Tubulin								Fed: SGK1+/+ vs. SGK1-/-	0.478597
		Nutrition	Genotype	Mean	STDV								Starved: SGK1+/+ vs. SGK1-/-	0.472951
		Fed*	SGK1+/+	0.213688	0.0909872
		Fed*	SGK1-/-	0.554251	0.198143
		Starved**	SGK1+/+	0.235226	0.137259
		Starved**	SGK1-/-	0.172583	0.0875881

## Sheet: Figure 4B
				Intensity [a.u.]		Normalized over Tubulin				ttest: Atg12-5/Tubulin	p-value		ttest: Atg12-5/Tubulin	p-value
Nutrition	Sample	Sample ID	Genotype	Atg12-5	Tubulin	Atg12-5	Mean	STDV		SGK1+/+ : Fed vs. Starved	0.274041		SGK1+/+ vs. SGK1-/-	0.188004
Fed*	Kidney 2	F2	SGK1+/+	167815156	215043512	0.780378	1.05138	0.253765		SGK1-/- : Fed vs. Starved	0.580612
Fed*	Kidney 3	F3	SGK1+/+	176652837	179682324	0.98314				Fed: SGK1+/+ vs. SGK1-/-	0.101677
Fed*	Kidney 7	F7	SGK1+/+	116989706	84127047	1.39063				Starved: SGK1+/+ vs. SGK1-/-	0.900389
Starved**	Kidney 5	S5	SGK1+/+	134300494	111365340	1.20595	1.31735	0.0965317
Starved**	Kidney 6	S6	SGK1+/+	133579653	92674543	1.44138
Starved**	Kidney 12	S12	SGK1+/+	105252347	80670436	1.30472
Fed*	Kidney 1	F1	SGK1-/-	122599245	95434208	1.28465	1.601	0.265052
Fed*	Kidney 8	F8	SGK1-/-	161863001	83723673	1.9333
Fed*	Kidney 9	F9	SGK1-/-	147210108	92874593	1.58504
Starved**	Kidney 4	S4	SGK1-/-	111789433	55109241	2.02851	1.36529	0.47343
Starved**	Kidney 10	S10	SGK1-/-	144986292	130253453	1.11311
Starved**	Kidney 11	S11	SGK1-/-	103106975	108050596	0.954247
* 24 h food and water ad libitum prior to sacrifice
** 24 h no food, water ad libitum prior to sacrifice
				Atg12-5/Tubulin
		Nutrition	Genotype	Mean	STDV
		Fed*	SGK1+/+	1.05138	0.253765
		Fed*	SGK1-/-	1.601	0.265052
		Starved**	SGK1+/+	1.31735	0.0965317
		Starved**	SGK1-/-	1.36529	0.47343

## Sheet: Figure 5B
	GFP-WIPI1	Puncta-positive cells (%)
Treatments		Experiment 1	Experiment 2	Experiment 3	Mean	SDTV	No. of analysed cells
siControl	DMEM/FCS	11	11	12.34	11.4467	0.631682	900
	DMEM/FCS+BafA1	12.64	16.78	12.91	14.11	1.89119	861		p-value
	EBSS	29.92	39.36	43.27	37.5167	5.60381	1541			DMEM/FCs	DMEM/FCS+BafA1	EBSS	EBSS+BafA1
	EBSS+BafA1	84.9	91.67	92.5	89.69	3.40395	931		siControl vs. siSGK1	0.00129841	0.00532535	0.0048974	0.0990702
siSGK1	DMEM/FCS	17.67	16	17.33	17	0.720602	900
	DMEM/FCS+BafA1	25	24.17	26.48	25.2167	0.955417	859			DMEM/FCS vs. DMEM/FCS+BafA1	DMEM/FCS vs. EBSS	EBSS vs. EBSS+BafA1
	EBSS	65.7	68.2	73.6	69.1667	3.2968	1016		siControl	0.176007	0.0212105	0.000959844
	EBSS+BafA1	96.68	97.34	95.43	96.4833	0.792058	876		siSGK1	0.000893725	0.00131861	0.00508248
	GFP-WIPI1	Experiment 1 [cell count]			Experiment 2 [cell count]			Experiment 3 [cell count]
Treatments		Puncta pos.	Puncta neg.	Total	Puncta pos.	Puncta neg.	Total	Puncta pos.	Puncta neg.	Total
siControl	DMEM/FCS	33	267	300	33	267	300	37	263	300
	DMEM/FCS+BafA1	33	228	261	50	248	298	39	263	302
	EBSS	155	363	518	198	305	503	225	295	520
	EBSS+BafA1	253	45	298	275	25	300	308	25	333
siSGK1	DMEM/FCS	53	247	300	48	252	300	52	248	300
	DMEM/FCS+BafA1	59	177	236	73	229	302	85	236	321
	EBSS	295	154	449	193	90	283	209	75	284
	EBSS+BafA1	233	8	241	256	7	263	355	17	372

## Sheet: Figure 6B
			experiment 1.1			experiment 2.1			experiment 3.1			experiment 4			experiment 5			experiment 6
			LC3-I	LC3-II	Tubulin	LC3-I	LC3-II	Tubulin	LC3-I	LC3-II	Tubulin	LC3-I	LC3-II	Tubulin	LC3-I	LC3-II	Tubulin	LC3-I	LC3-II	Tubulin
siControl	fed	-BafA1	112673081	39959857	124144443	83269075	34656199	98032486	62589235	22511366	57069807	24795693	4476322	21776680	18596326	10215667	22784262	5710058	3388796	24718478
		+BafA1	60095808	62990090	124062662	82438736	78837880	89242729	67398232	81270324	56829264	27233819	22172869	52152961	16585581	32889717	37466272	7901761	22038991	26143879
	starved	-BafA1	42383910	25990074	80210635	55336621	29945705	60764791	65085835	36834588	47835807	25700877	10278691	30662558	6875035	9127767	28381430	7346775	6771196	31533496
		+BafA1	57802679	86468042	112654752	50426931	74356362	50390070	63611389	111404487	25486242	20602277	48551149	29151978	8813966	30458179	34135971	5718170	26562337	14108464
siSGK1	fed	-BafA1	133168470	86938783	113488096	92837105	59241935	68354639	93333541	54766993	64179024	44389713	25850528	15909067	23279270	32298627	19919648	12957649	17802824	17958643
		+BafA1	75647144	122204641	121065154	102433093	129529189	76943697	86816803	130719883	48215509	39826556	78503907	19517355	30016977	59147423	20578933	17301088	58588083	15061794
	starved	-BafA1	66570441	91713404	115266760	59245126	74980178	55427287	77735315	89989755	46499891	38380979	46830694	35119845	5338906	26490831	10330089	7751775	31215518	9737428
		+BafA1	94238266	181080948	103820206	75565997	154287398	55362823	60201063	152296343	41292520	20423827	85932744	6804709	8453201	56502008	7933999	8803537	74827819	6595186
ratios			LC3-II/Tubulin
			Experiment 1.1	Experiment 2.1	Experiment 3.1	Experiment 4	Experiment 5	Experiment 6	Mean	STDV
siControl	fed	-BafA1	0.321882	0.353517	0.394453	0.205556	0.448365	0.137096	0.310145	0.117573
		+BafA1	0.507728	0.88341	1.43008	0.425151	0.877849	0.842989	0.827867	0.355848
	starved	-BafA1	0.324023	0.492813	0.770021	0.33522	0.321611	0.21473	0.409736	0.197687
		+BafA1	0.767549	1.47562	4.37116	1.66545	0.892261	1.88272	1.84246	1.31303
siSGK1	fed	-BafA1	0.766061	0.866685	0.853347	1.62489	1.62145	0.991323	1.12063	0.395845
		+BafA1	1.00941	1.68343	2.71116	4.02226	2.87417	3.88985	2.69838	1.19047
	starved	-BafA1	0.795662	1.35277	1.93527	1.33345	2.56443	3.20573	1.86455	0.892199
		+BafA1	1.74418	2.78684	3.68823	12.6284	7.1215	11.3458	6.5525	4.59828
			p-value
			LC3-II/Tubulin
				DMEM/FCS	DMEM/FCS+BafA1	EBSS	EBSS+BafA1
			siControl vs. siSGK1	0.00315187	0.0105943	0.00950954	0.0537302
				DMEM/FCS vs. DMEM/FCS+BafA1	DMEM/FCS vs. EBSS	EBSS vs. EBSS+BafA1
			siControl	0.0144948	0.319306	0.0438523
			siSGK1	0.0212278	0.10479	0.0543882

[truncated: 1 more sheets: Figure 7B]
